# Supplementary material for: Effects of Combining High-Definition Transcranial Direct Current Stimulation with Short-Foot Exercise on Chronic Ankle Instability: A Pilot Randomized and Double-Blinded Study
Source: PubMed Central journal article supplement (PMC7602979; doi:10.3390/brainsci10100749), 2020-10-17
Supplement: brainsci-10-00749-s001.pdf [file brainsci-10-00749-s001.pdf]

**Table S1.** Blinding and tolerability efficacy survey outcomes.

| <b>Montage</b>       | <b>Response [Real/Sham]</b> | <b>Confidence Level [Real/Sham]</b> | <b>Side Effect</b> |
|----------------------|-----------------------------|-------------------------------------|--------------------|
| Multi-target (M1+S1) | 65%/35%                     | 7.03/6.45                           | 1.14               |
| Sham                 | 50%/50%                     | 6.76/5.56                           | 1.08               |

Response represents the proportion of participants who reported they believed to receive real/sham intervention. Confidence level represents the average self-reported confidence in this response, on a scale from 1 (not confident at all) to 10 (fully confident). Side effect represents self-reported side effects after the intervention, on a scale from 1 (no side effect) to 4 (serious side effect).
